# Supplementary material for: Coinfections by noninteracting pathogens are not independent and require new tests of interaction
Source: PubMed Central journal article supplement (PMC6890165; doi:10.1371/journal.pbio.3000551), 2019-12-03
Supplement: pbio.3000551.s008.pdf [file pbio.3000551.s008.pdf]

## S1 Table

| Pathogens with $n$ distinct types, strains or clones | $n$ | Observed counts, $O_k$ |      |     |     |    |   |   |   |   |   | Total $N$ |
|------------------------------------------------------|-----|------------------------|------|-----|-----|----|---|---|---|---|---|-----------|
|                                                      |     | 0                      | 1    | 2   | 3   | 4  | 5 | 6 | 7 | 8 | 9 |           |
| Pathogens of <i>Ixodes ricinus</i> ticks             | 37  | 147                    | 66   | 24  | 18  | 5  | 2 | - | - | - | - | 262       |
| Barley and cereal yellow dwarf viruses               | 5   | 1570                   | 224  | 69  | 17  | 6  | 4 | - | - | - | - | 1890      |
| Respiratory viruses                                  | 11  | 17630                  | 8568 | 964 | 105 | 15 | 2 | - | - | - | - | 27284     |
