# Supplementary material for: Coinfections by noninteracting pathogens are not independent and require new tests of interaction
Source: PubMed Central journal article supplement (PMC6890165; doi:10.1371/journal.pbio.3000551), 2019-12-03
Supplement: pbio.3000551.s009.pdf [file pbio.3000551.s009.pdf]

## S2 Table

|                                          | NiSP  |          | Binomial |          | $\Delta AIC=2\Delta L$ | GoF          |
|------------------------------------------|-------|----------|----------|----------|------------------------|--------------|
|                                          | $R_0$ | $L$      | $p$      | $L$      |                        | $p$          |
| Pathogens of <i>Ixodes ricinus</i> ticks | 1.021 | -314.1   | 0.020    | -329.3   | 30.5                   | <b>0.476</b> |
| Barley and cereal yellow dwarf viruses   | 1.051 | -1180.8  | 0.048    | -1261.9  | 162.2                  | 0.000        |
| Respiratory viruses                      | 1.037 | -22619.0 | 0.036    | -21731.9 | -1774.2                | 0.000        |
