# Supplementary material for: Coinfections by noninteracting pathogens are not independent and require new tests of interaction
Source: PubMed Central journal article supplement (PMC6890165; doi:10.1371/journal.pbio.3000551), 2019-12-03
Supplement: pbio.3000551.s010.pdf [file pbio.3000551.s010.pdf]

### S3 Table

|         |                              | N     | Observed counts, $O_r$ |      |     |      |      |     |    |     |
|---------|------------------------------|-------|------------------------|------|-----|------|------|-----|----|-----|
|         |                              |       | $\emptyset$            | F    | M   | V    | FM   | FX  | MX | FMX |
| 74      | Léger et al. (1923)          | 250   | 83                     | 111  | 49  | 1    | 6    | 0   | 0  | 0   |
| 75      | Bédier et al. (1924)         | 135   | 45                     | 58   | 27  | 3    | 2    | 0   | 0  | 0   |
| 76      | Knowles and White (1930)     | 809   | 642                    | 149  | 12  | 1    | 2    | 2   | 0  | 1   |
| 82 (!)  | Dorolle (1927)               | 652   | 232                    | 258  | 64  | 54   | 32   | 12  | 0  | 0   |
| 84      | Phillips (1923)*             | 645   | 409                    | 112  | 10  | 109  | 0    | 4   | 1  | 0   |
| 88      | Lalor (1913)*                | 207   | 94                     | 47   | 21  | 40   | 0    | 3   | 2  | 0   |
| 106     | Wilson (1936)                | 3393  | 1784                   | 1103 | 87  | 19   | 244  | 63  | 2  | 91  |
| 108 (!) | Borel and Levanan (1927)     | 1249  | 885                    | 227  | 23  | 92   | 3    | 16  | 3  | 0   |
| 109 (!) | Borel and Levanan (1927)     | 1022  | 947                    | 19   | 12  | 39   | 0    | 4   | 1  | 0   |
| 111     | Banerjea (1930)*             | 1519  | 578                    | 225  | 7   | 668  | 0    | 41  | 0  | 0   |
| 112     | Khambata (1913)*             | 112   | 72                     | 26   | 8   | 4    | 0    | 1   | 1  | 0   |
| 113     | Ramsay (1928)*               | 1514  | 1073                   | 268  | 9   | 160  | 0    | 3   | 1  | 0   |
| 114     | Bailey (1928)*               | 1068  | 547                    | 396  | 67  | 35   | 18   | 5   | 0  | 0   |
| 116     | Masterman (1913)             | 700   | 238                    | 317  | 75  | 55   | 4    | 9   | 2  | 0   |
| 117     | Angus (1919)*                | 40168 | 28936                  | 2614 | 9   | 8483 | 0    | 126 | 0  | 0   |
| 118     | Gordon et al. (1991)         | 268   | 208                    | 14   | 6   | 30   | 1    | 6   | 3  | 0   |
| 119     | Lalor (1912)*                | 151   | 52                     | 38   | 13  | 33   | 4    | 6   | 4  | 1   |
| 123     | Carter (1927)*               | 11260 | 9510                   | 170  | 568 | 986  | 2    | 4   | 19 | 1   |
| 124     | Schnuffer (1938)             | 3266  | 2148                   | 593  | 234 | 196  | 42   | 30  | 15 | 8   |
| 127     | Banchongaksorn et al. (1996) | 913   | 487                    | 221  | 5   | 179  | 0    | 21  | 0  | 0   |
| 130     | Treadgold (1918)             | 540   | 396                    | 3    | 1   | 136  | 0    | 4   | 0  | 0   |
| 132     | Collins et al. (1988)        | 614   | 407                    | 151  | 11  | 19   | 3    | 21  | 2  | 0   |
| 133     | Mizushima et al. (1994)      | 506   | 231                    | 144  | 0   | 81   | 1    | 39  | 4  | 6   |
| 137     | United Fruit Co. (1925)*     | 2742  | 1973                   | 435  | 14  | 299  | 0    | 21  | 0  | 0   |
| 68      | Campbell et al. (1987)       | 147   | 77                     | 56   | 0   | 1    | 11   | 1   | 0  | 1   |
| 69      | Campbell et al. (1987)       | 142   | 26                     | 68   | 3   | 0    | 40   | 4   | 0  | 1   |
| 70      | Campbell et al. (1987)       | 196   | 41                     | 112  | 2   | 0    | 25   | 10  | 0  | 6   |
| 71      | May et al. (1997)            | 230   | 40                     | 123  | 1   | 0    | 32   | 7   | 0  | 27  |
| 77      | Alifrangis et al. (1999)     | 126   | 5                      | 72   | 2   | 0    | 31   | 13  | 0  | 3   |
| 78      | Hellgren et al. (1994)       | 163   | 32                     | 105  | 5   | 0    | 20   | 1   | 0  | 0   |
| 79      | Thomson et al. (1994)        | 1465  | 770                    | 641  | 17  | 2    | 30   | 5   | 0  | 0   |
| 80      | Gbary et al. (1988)          | 735   | 444                    | 234  | 22  | 7    | 20   | 7   | 1  | 0   |
| 95      | Deloron et al. (1989)        | 1465  | 770                    | 641  | 17  | 2    | 30   | 5   | 0  | 0   |
| 96      | Deloron et al. (1989)        | 245   | 130                    | 95   | 0   | 0    | 16   | 4   | 0  | 0   |
| 97      | Deloron et al. (1989)        | 253   | 126                    | 109  | 4   | 0    | 13   | 0   | 0  | 1   |
| 98      | Deloron et al. (1989)        | 225   | 136                    | 82   | 0   | 0    | 3    | 4   | 0  | 0   |
| 99      | May et al. (1997)            | 159   | 97                     | 56   | 0   | 1    | 3    | 2   | 0  | 0   |
| 100     | Trape et al. (1992)          | 2465  | 2372                   | 85   | 6   | 0    | 1    | 1   | 0  | 0   |
| 101     | Trape et al. (1994)          | 8539  | 2208                   | 4254 | 133 | 50   | 1435 | 227 | 3  | 229 |
| 102     | Molineaux et al. (1980)      | 7026  | 2658                   | 3295 | 143 | 36   | 742  | 108 | 6  | 38  |
| 103     | Molineaux et al. (1980)      | 6526  | 3474                   | 2015 | 183 | 15   | 757  | 42  | 2  | 38  |
