# Supplementary material for: Coinfections by noninteracting pathogens are not independent and require new tests of interaction
Source: PubMed Central journal article supplement (PMC6890165; doi:10.1371/journal.pbio.3000551), 2019-12-03
Supplement: pbio.3000551.s011.pdf [file pbio.3000551.s011.pdf]

## S4 Table

|                                       | NiSP ( $\beta$ only) |          | NiSP ( $\beta$ & $\gamma$ ) |                   |          | Model selection |              | Binomial     |          | $\Delta$ AIC | GoF<br>$p$   |
|---------------------------------------|----------------------|----------|-----------------------------|-------------------|----------|-----------------|--------------|--------------|----------|--------------|--------------|
|                                       | $\beta$              | $L$      | $\beta$                     | $\gamma$          | $L$      | $\chi^2$        | $p$          | $p$          | $L$      |              |              |
| Human papillomavirus                  | 1.032                | -6580.9  | <b>1.178</b>                | <b>0.142</b>      | -6573.1  | 7.794           | <b>0.005</b> | 0.031        | -6868.8  | 589.3        | <b>0.986</b> |
| Pathogens of <i>I. ricinus</i> ticks  | <b>1.021</b>         | -314.1   | 1.161                       | 0.137             | -313.7   | 0.360           | 0.549        | 0.020        | -329.3   | 30.5         | <b>0.476</b> |
| Anther smut ( <i>M. violaceum</i> )   | <b>1.009</b>         | -611.4   | 1.009                       | 0.000             | -611.4   | 0.000           | 1.000        | 0.009        | -690.8   | 158.8        | 0.000        |
| Barley yellow dwarf viruses           | <b>1.051</b>         | -1180.8  | 1.051                       | 0.000             | -1180.8  | 0.000           | 1.000        | 0.048        | -1261.9  | 162.2        | 0.000        |
| <i>Borrelia afzelii</i> on bank voles | <b>1.044</b>         | -652.1   | 1.044                       | 0.000             | -652.1   | 0.000           | 1.000        | 0.040        | -799.0   | 293.8        | 0.000        |
| Malaria ( <i>Plasmodium vivax</i> )   | 1.021                | -3169.2  | <b>1.162</b>                | <b>0.138</b>      | -3164.6  | 4.588           | <b>0.032</b> | 0.021        | -3467.3  | 603.5        | 0.000        |
| Respiratory viruses                   | 1.037                | -22619.0 | $4.7 \times 10^9$           | $4.6 \times 10^9$ | -21731.9 | 887.057         | 0.000        | <b>0.036</b> | -21731.9 | -2.0         | 0.000        |
