# Supplementary material for: Coinfections by noninteracting pathogens are not independent and require new tests of interaction
Source: PLoS Biol. 2019 Dec 3;17(12):e3000551. doi: 10.1371/journal.pbio.3000551 (PMC6890165; doi:10.1371/journal.pbio.3000551)
Supplement: S12 Data — (CSV) [file pbio.3000551.s023.csv]

Number	Data	DataLowerCI	DataUpperCI	NiSPModel	BinomialModel
0	17630	17474.2806981059	17784.8696260308	18178.5315847108	18175.7148248909
1	8568	8417.78780380704	8719.29339217977	7519.49663657285	7521.25133504459
2	964	905.084444181103	1025.63491907263	1413.82630938798	1414.70543599501
3	105	85.9081499257889	127.057367907676	159.497764006344	159.658922283998
4	15	8.39624859569528	24.7358027791116	11.9955973635883	12.0123811955521
5	2	0.242212642215067	7.22399596323258	0.631520133882462	0.63264933738815
